# Supplementary material
Source: publisher figshare collection journal article supplement (https://acs.figshare.com/ndownloader/files/5761914)
Supplement: Supplementary file 1 [file 5761914]

# J | A | C | S

JOURNAL OF THE AMERICAN CHEMICAL SOCIETY

J. Am. Chem. Soc., 1998, 120(48), 12678-12679, DOI: [10.1021/ja982663a](https://doi.org/10.1021/ja982663a)

## Terms & Conditions

Electronic Supporting Information files are available without a subscription to ACS Web Editions. The American Chemical Society holds a copyright ownership interest in any copyrightable Supporting Information. Files available from the ACS website may be downloaded for personal use only. Users are not otherwise permitted to reproduce, republish, redistribute, or sell any Supporting Information from the ACS website, either in whole or in part, in either machine-readable form or any other form without permission from the American Chemical Society. For permission to reproduce, republish and redistribute this material, requesters must process their own requests via the RightsLink permission system. Information about how to use the RightsLink permission system can be found at <http://pubs.acs.org/page/copyright/permissions.html>

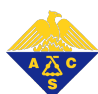

ACS Publications

MOST TRUSTED. MOST CITED. MOST READ.

Copyright © 1998 American Chemical Society

## Supporting Information.

**Preparation of Polymer Vesicles.** Chloroform and water used in this study were distilled. Tricosanoic acid (TCDA) was purchased from DOJINDO LABORATORIES (Japan) and used without purification. 10,12-Pentacosadiynoic acid (PCDA) was purchased from Lancaster Co. (U.K.) and was not purified before use. Dioctadecyl glyceryl ether- $\beta$ -glucoside (DGG) was synthesized in our laboratory. It was prepared according to the method described by Six *et al.*<sup>1</sup> for the stereochemical isomers, starting with DL- $\alpha, \beta$ -dialkyl glycerol. The mixed vesicles were prepared using modified probe sonication method.<sup>2</sup> Vesicles of mixture of polymerizable matrix lipid and receptor have been formed by putting their chloroform solution in a rotary evaporator and the molar ratio of receptor DGG to PCDA or TCDA was 0.02. The organic solvent was evaporated to yield a thin film of the lipids on the glass. An appropriate amount of double distilled water was added to give a total lipid concentration of 1mM. The sample was heated to 80°C, and sonicated for 30 min. The warm solution was filtered through a 0.8 mm nylon filter to remove undispersed lipid, and cooled to room temperature. Prior to polymerization the vesicle solution was purged with N<sub>2</sub> for 10 min. The polymerization was achieved by irradiation of the solution with a UV pencil lamp (254 nm) (UV-5, made in China).

**Colorimetric Detection of E.coli and Amino Acid.** The international standard strain of E.coli, [ATCC25922], used in this study was purchased from Center for Medical Culture Collection (Bacteria) – National Institute for the Control of Pharmaceutical and Biological Products, Ministry of Public Health, Beijing China. E.coli was dispersed in 0.85% aqueous solution of sodium chloride (pH 6.0). A 0.1 ml solution containing about  $300 \times 10^6$  E.coli per ml was added to 2.5 ml of polymer vesicles. The color change of the polymer vesicles composed of TCDA/DGG or PCDA/DGG was detected by UV-Vis spectrometer. Aspartic acid, glutamic acid and alanine used in this study were all

biological pure and were not purified before use. A 0.1 ml aqueous solution of aspartic acid with the concentration of 2 mg/ml was added to 2.5 ml of polymer vesicles. Similarly glutamic acid and alanine were added and the solutions were analyzed with UV-Vis spectrophotometry.

**Isotherms of Pure and Mixed TCDA/DGG and PCDA/DGG Monolayers.**

TCDA and PCDA were not purified before used in this study. All  $\pi$ -A isotherm curves were obtained by FACE surface pressure meter HBM (made in Japan). The pressure sensor has a resolution of 0.1 mN/m. For each isotherm experiment, 200  $\mu$ l of 1.0mM sample was spread on the surface, waiting 15 min for solvent evaporation before compression. The barrier was compressed at a speed of 20  $\text{cm}^2/\text{min}$ . Isotherms of monolayers with different ratio of TCDA/DGG and PCDA/DGG have been compared and shown in the enclosed Figure 4.

1 Six, L.; Rueb, K. P.; Lieflander, M. J. *Colloid & Interface Sci.* **1983**, *93*, 109.

2 New, R. R. C. In *Liposomes: a practical approach*; New R. R. C., Ed.; Oxford University Press: Oxford, 1990; pp 33-104.
